# Supplementary material
Source: publisher figshare collection journal article supplement (https://frontiersin.figshare.com/ndownloader/files/28168239)
Supplement: Supplementary file [file 28168239]

## SUPPLEMENTAL MATERIAL

P2. Figure I. Flow chart of patient selection

P3. Table I. Baseline Comparison between 90-day outcome groups

P4-P5. Figure II. Adjusted receiver operating curve and area under curve of SII

- a. Admission SII——P4
- b. Day-1 SII——P5

P6. Table II. Multivariate logistic regression models predicting 90-day poor outcome

Figure I. Flow chart of patient selection

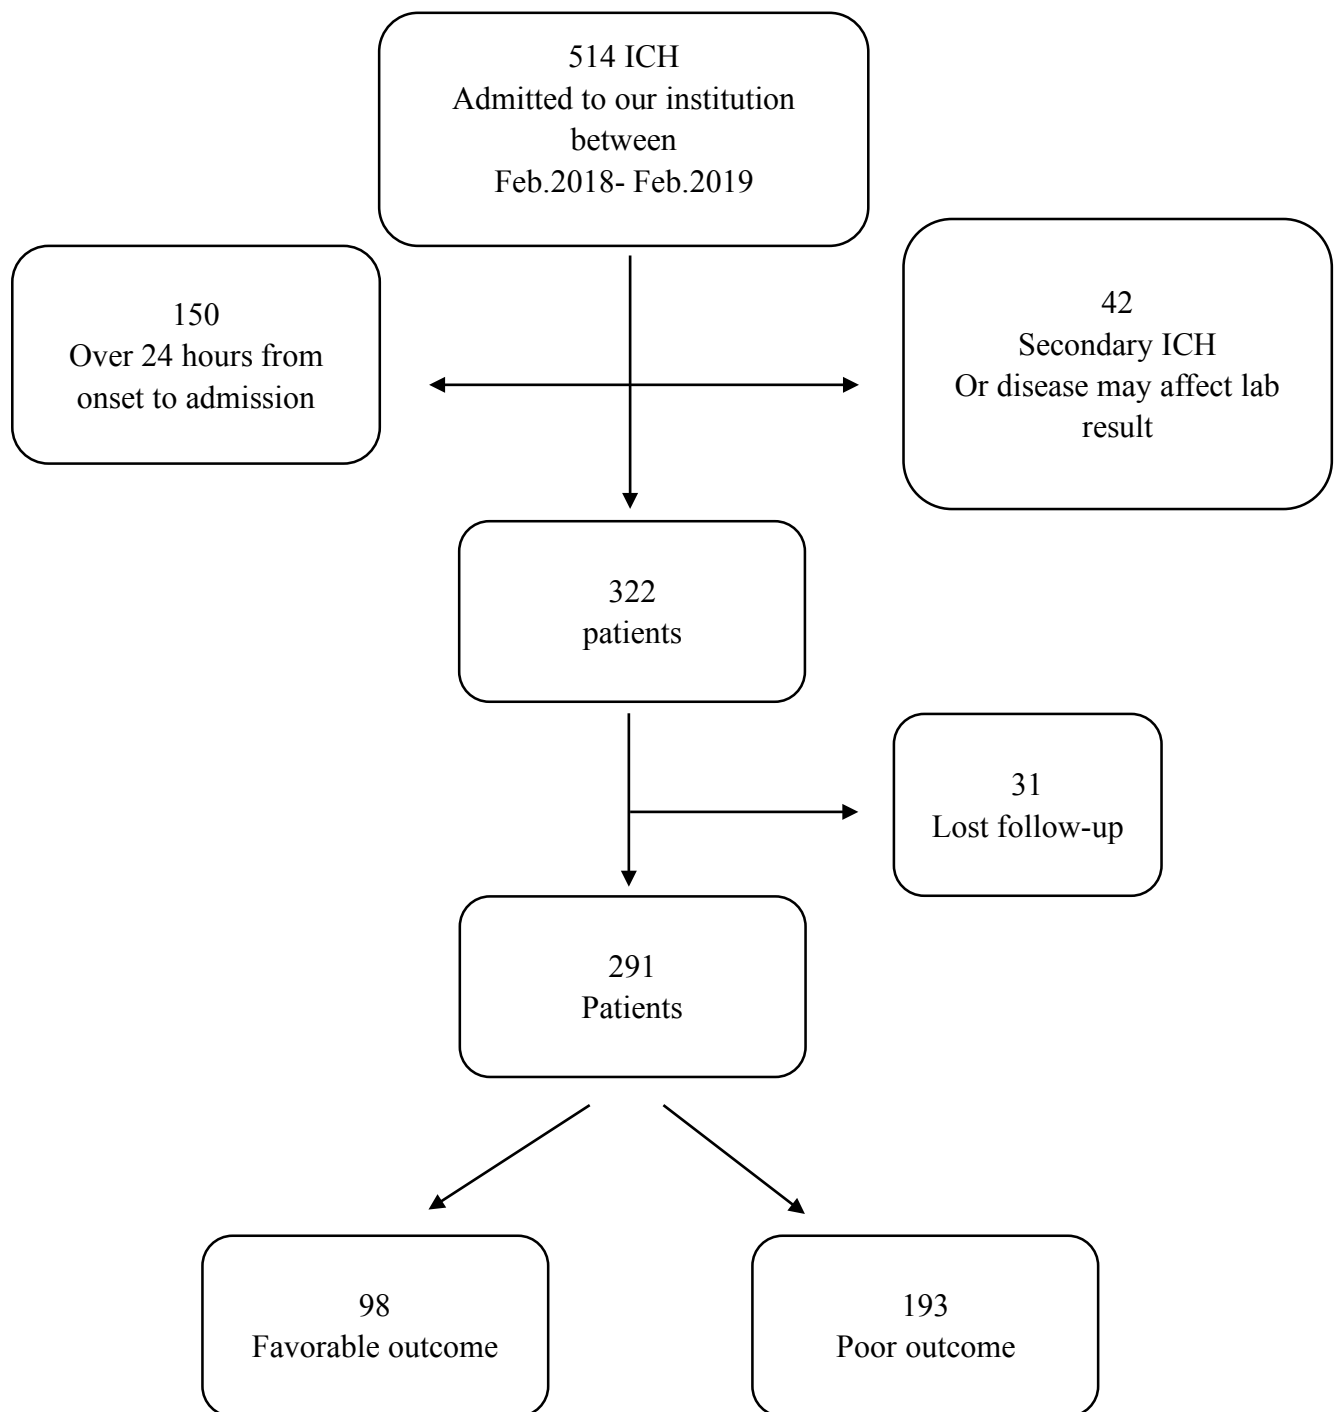

Table I. Baseline Comparison between 90-day outcome groups

|                                    | Full cohort<br>(n=291) | Favorable<br>Outcome<br>(n=98) | Poor outcome<br>(n=193) | <i>P</i> value       |
|------------------------------------|------------------------|--------------------------------|-------------------------|----------------------|
| Hypertension                       | 180 (62%)              | 57 (58%)                       | 123 (64%)               | 0.43 <sup>*</sup>    |
| Diabetes mellitus                  | 28 (9%)                | 10 (10%)                       | 18 (9%)                 | 0.97 <sup>*</sup>    |
| Chronic kidney disease             | 8 (3%)                 | 2 (2%)                         | 6 (3%)                  | 0.72 <sup>*</sup>    |
| Coronary artery disease            | 7 (2%)                 | 1 (1%)                         | 6 (3%)                  | 0.43 <sup>*</sup>    |
| Anticoagulated                     | 9 (3%)                 | 2 (2%)                         | 7 (4%)                  | 0.72 <sup>*</sup>    |
| Antiplatelets                      | 22 (8%)                | 8 (8%)                         | 14 (8%)                 | 0.95 <sup>*</sup>    |
| Prior stroke                       | 22 (8%)                | 8 (8%)                         | 14 (8%)                 | 0.97 <sup>*</sup>    |
| Current smoker                     | 97 (33%)               | 37 (38%)                       | 60 (31%)                | 0.31 <sup>*</sup>    |
| Alcohol abuse                      | 37 (13%)               | 16 (16%)                       | 21 (11%)                | 0.25 <sup>*</sup>    |
| Admission PLT, *10 <sup>9</sup> /L | 176 [130-215]          | 172 [137-203]                  | 180 [128-233]           | 0.29 <sup>†</sup>    |
| Day-1 PLT, *10 <sup>9</sup> /L     | 155 [118-200]          | 160 [127-200]                  | 151 [108-199]           | 0.35 <sup>†</sup>    |
| Admission ANC, *10 <sup>9</sup> /L | 9.2 [5.7-11.7]         | 6.4 [4.8-10.0]                 | 10.0 [6.9-12.5]         | <0.0001 <sup>†</sup> |
| Day-1 ANC, *10 <sup>9</sup> /L     | 8.8 [6.7-11.5]         | 7.3 [5.5-9.0]                  | 9.9 [7.4-12.9]          | <0.0001 <sup>†</sup> |
| Admission ALC, *10 <sup>9</sup> /L | 1.12 [0.76-1.65]       | 1.03 [0.78-1.54]               | 1.14 [0.76-1.77]        | 0.43 <sup>†</sup>    |
| Day-1 ALC, *10 <sup>9</sup> /L     | 0.90 [0.63-1.29]       | 1.16 [0.82-1.49]               | 0.80 [0.53-1.11]        | <0.0001 <sup>†</sup> |

PLT, platelets; ANC, absolute neutrophil count; ALC, absolute lymphocyte count

<sup>\*</sup>  $\chi^2$  test or Fisher exact test

<sup>†</sup> Mann-Whitney test

Figure II Unadjusted receiver operating curve and area under curve of SII

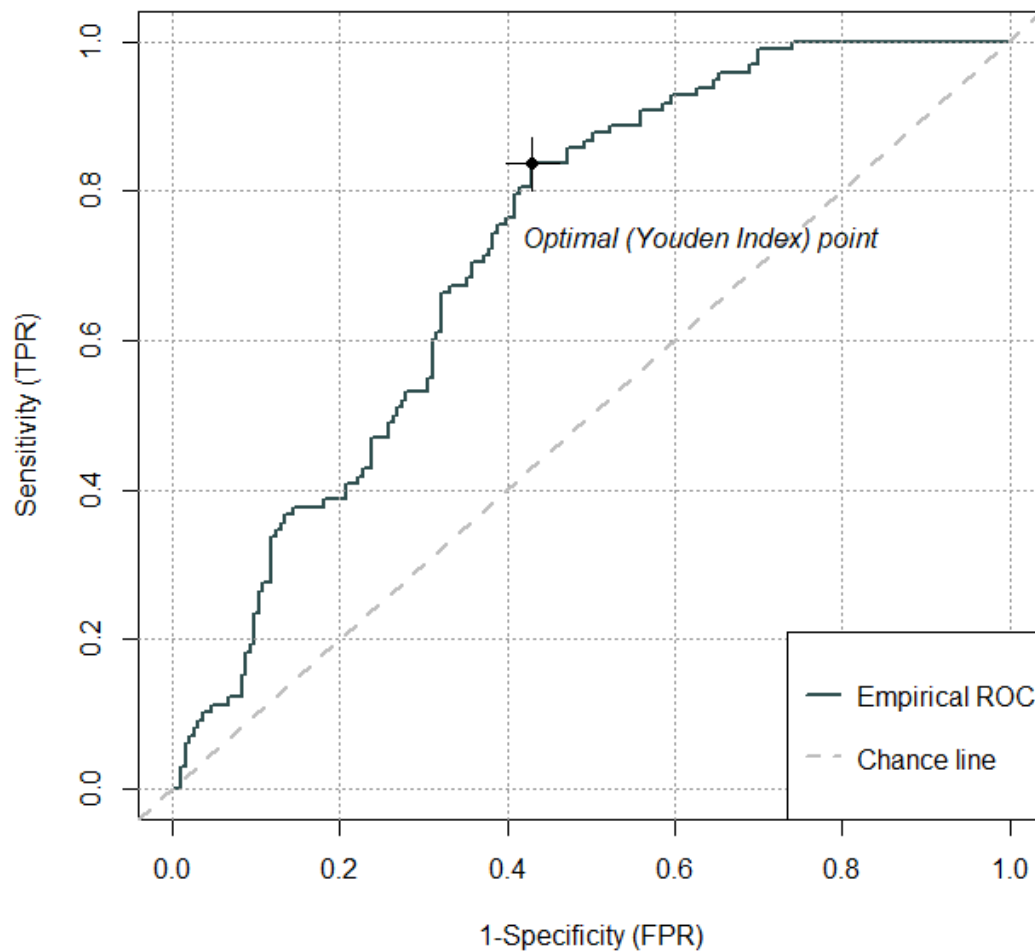

a. Admission SII

Area under curve 0.726 (95%CI 0.662-0.791)

Optimal point (Admission SII= $1315 \times 10^9/L$ ) sensitivity 83.7%, specificity 56.9%.

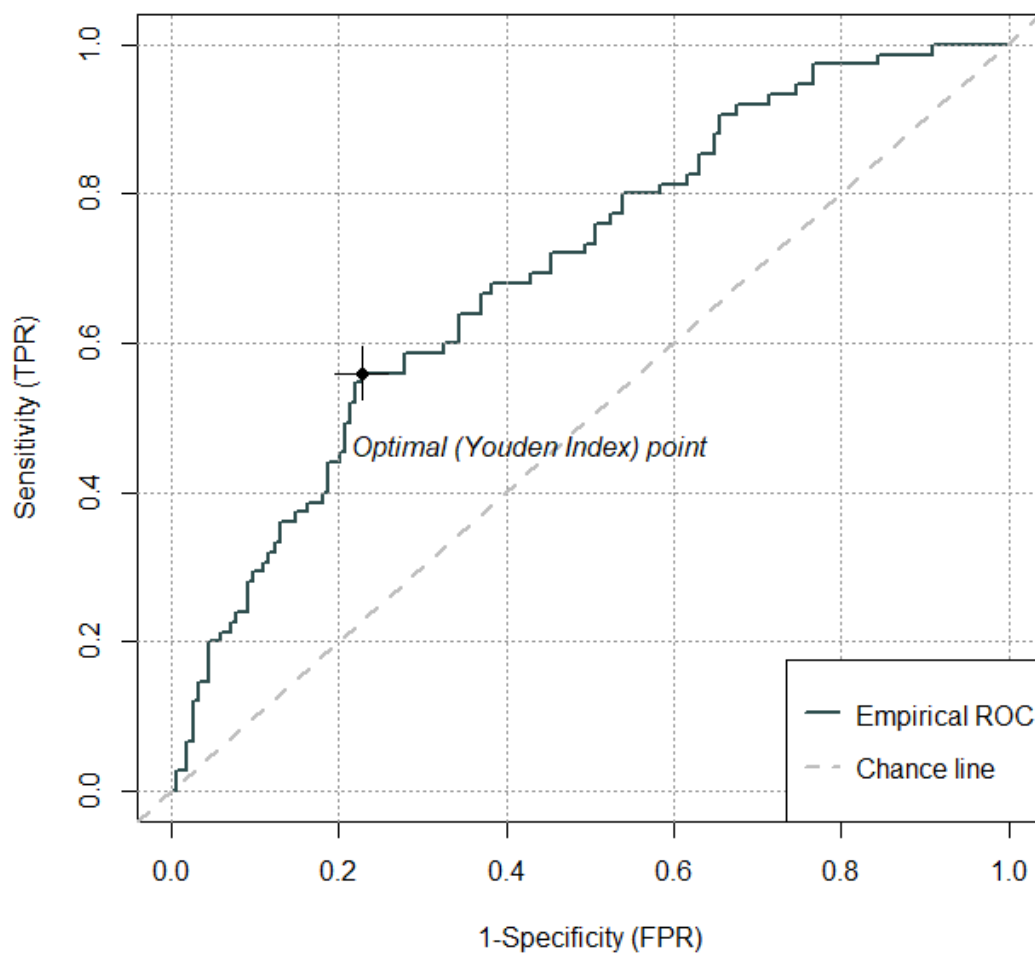

b. Day-1 SII

Area under curve 0.699 (95%CI 0.624-0.774)

Optimal point (Day-1 SII= $1700 \times 10^9/\text{L}$ ), sensitivity 53.3%, specificity 77.3%.

Table II. Multivariate logistic regression models predicting 90-day poor outcome

|                                           | Odds Ratio | 95% CI lower | 95% CI upper | P Value |
|-------------------------------------------|------------|--------------|--------------|---------|
| <b>Model 1</b>                            |            |              |              |         |
| Male                                      | 0.53       | 0.25         | 1.09         | 0.09    |
| Age                                       | 1.03       | 1.01         | 1.06         | 0.007   |
| GCS                                       | 0.73       | 0.64         | 0.82         | <0.0001 |
| Log ICH volume                            | 2.18       | 1.41         | 3.52         | 0.0008  |
| IVH                                       | 1.86       | 0.91         | 3.85         | 0.09    |
| ICH Location                              | 2.18       | 1.08         | 4.56         | 0.03    |
| Craniotomy                                | 1.19       | 0.48         | 3.05         | 0.71    |
| Admission SII                             | 1.19       | 0.81         | 1.75         | 0.37    |
| <b>Model 2</b>                            |            |              |              |         |
| Male                                      | 0.62       | 0.28         | 1.67         | 0.24    |
| Age                                       | 1.04       | 1.01         | 1.07         | 0.004   |
| GCS                                       | 0.79       | 0.69         | 0.90         | 0.0005  |
| Log ICH volume                            | 2.31       | 1.39         | 4.07         | 0.002   |
| IVH                                       | 1.67       | 0.77         | 3.64         | 0.19    |
| ICH Location                              | 2.86       | 1.28         | 6.60         | 0.01    |
| Craniotomy                                | 0.97       | 0.37         | 2.85         | 0.95    |
| Day-1 SII                                 | 1.74       | 1.03         | 3.00         | 0.04    |
| <b>Model 3</b>                            |            |              |              |         |
| Male                                      | 0.53       | 0.25         | 1.07         | 0.08    |
| Age                                       | 1.03       | 1.01         | 1.06         | 0.006   |
| GCS                                       | 0.73       | 0.64         | 0.82         | <0.0001 |
| Log ICH volume                            | 2.18       | 1.42         | 3.52         | 0.0007  |
| IVH                                       | 1.82       | 0.88         | 3.76         | 0.10    |
| ICH Location                              | 2.18       | 1.08         | 4.52         | 0.03    |
| Craniotomy                                | 1.19       | 0.48         | 3.06         | 0.71    |
| Admission<br>SII>1315 *10 <sup>9</sup> /L | 1.42       | 0.72         | 2.82         | 0.31    |
| <b>Model 4</b>                            |            |              |              |         |
| Male                                      | 0.63       | 0.28         | 1.38         | 0.26    |
| Age                                       | 1.04       | 1.01         | 1.06         | 0.007   |
| GCS                                       | 0.79       | 0.68         | 0.89         | 0.0003  |
| Log ICH volume                            | 2.38       | 1.44         | 4.17         | 0.001   |
| IVH                                       | 1.70       | 0.79         | 3.72         | 0.17    |
| ICH Location                              | 2.90       | 1.31         | 6.70         | 0.01    |
| Craniotomy                                | 0.97       | 0.37         | 2.59         | 0.95    |
| Day1-SII>1700<br>*10 <sup>9</sup> /L      | 2.36       | 1.09         | 5.26         | 0.03    |

Note: variables included in the multivariate logistic regression:

model 1: Male, age, GCS, ICH volume, IVH, ICH location, craniotomy, Admission SII

model 2: Male, age, GCS, ICH volume, IVH, ICH location, craniotomy, Day-1 SII

model 3: Male, age, GCS, ICH volume, IVH, ICH location, craniotomy, Admission SII>1315 \*10<sup>9</sup>/L

model 4: Male, age, GCS, ICH volume, IVH, ICH location, craniotomy, Day1-SII>1700 \*10<sup>9</sup>/L
